# Supplementary material for: In Vitro Potential of Clary Sage and Coriander Essential Oils as Crop Protection and Post-Harvest Decay Control Products
Source: MDPI journal article supplement (doi:10.3390/foods11030312), 2022-01-24
Supplement: s1 [file s1]

**Table S1.** RC<sub>50</sub> values (µl.cm<sup>-2</sup>) for the three different tested EO, from the two experimental plots – after 24 h of exposure – against *E. kuehniella*, *B. tabaci*, and *R. dominica* adults (n = 3).

| Insect species       |                  | Aerial parts of coriander |             | Seeds of coriander |             | Sage inflorescences |             |
|----------------------|------------------|---------------------------|-------------|--------------------|-------------|---------------------|-------------|
|                      |                  | Unpolluted                | Polluted    | Unpolluted         | Polluted    | Unpolluted          | Polluted    |
| <i>E. kuehniella</i> | RC <sub>50</sub> | 3.80                      | 3.70        | 2.61               | 3.31        | 3.01                | 3.80        |
|                      | Slope ± SE       | 0.51 ± 0.11               | 0.51 ± 0.10 | 0.55 ± 0.01        | 0.71 ± 0.11 | 0.66 ± 0.11         | 0.52 ± 0.11 |
|                      | χ <sup>2</sup>   | 0.45                      | 0.50        | 0.71               | 0.08        | 4.40                | 0.45        |
| <i>B. tabaci</i>     | RC <sub>50</sub> | 3.77                      | 2.63        | 2.61               | 2.61        | 3.14                | 3.19        |
|                      | Slope ± SE       | 0.46 ± 0.1                | 0.84 ± 0.1  | 0.55 ± 0.09        | 0.55 ± 0.09 | 0.7 ± 0.09          | 0.38 ± 0.08 |
|                      | χ <sup>2</sup>   | 0.52                      | 1.24        | 0.7                | 0.72        | 0.08                | 0.38        |
| <i>R. dominica</i>   | RC <sub>50</sub> | 0.08                      | 0.07        | 0.16               | 0.11        | 0.10                | 0.13        |
|                      | Slope ± SE       | 31.6 ± 2.78               | -4.8 ± 2.06 | 9.73 ± 2.5         | 12.19 ± 2.3 | 15.95 ± 2.37        | 10.9 ± 2.39 |
|                      | χ <sup>2</sup>   | 8.46                      | 5.28        | 0.23               | 40.37       | 2.12                | 3.77        |

RC<sub>50</sub>: median repellent concentration; SE: Standard error. Data have been tested by χ<sup>2</sup>-test for homogeneity of 1:1 ratio.
